# Supplementary material
Source: MDPI journal article supplement (https://www.mdpi.com/1099-4300/10/3/240)
Supplement: s1 [file s1]

*Correction*

**Entropy 2008, 10, 240-247: Ferri *et al.* Deformed Generalization of the Semiclassical Entropy.**

**Peter Harremos**

Editor-in-Chief of *Entropy*, Centrum voor Wiskunde en Informatica, Kruislaan 413, NL-1098 SJ Amsterdam, The Netherlands

E-mail: P.Harremoes@cw.nl

*Received: 10 November 2008 / Published: 11 November 2008*

---

It has come to our attention that names of authors have been misspelled in a paper recently published in Entropy [1]. The correct names are: Gustavo Ferri, Felipe Olivares, Flavia Pennini, Angelo Plastino, Angel R. Plastino and Montserrat Casas. We apologize for this mistake and any inconvenience caused.

**References and Notes**

1. Ferri, G.; Olivares, F.; Pennini, F.; Plastino, A.; Plastino, A.R.; Casas, M. Deformed Generalization of the Semiclassical Entropy. *Entropy* **2008**, *10*, 240-247; DOI 10.3390/e10030240.

© 2008 by the authors; licensee Molecular Diversity Preservation International, Basel, Switzerland. This article is an open-access article distributed under the terms and conditions of the Creative Commons Attribution license (<http://creativecommons.org/licenses/by/3.0/>).
